# Supplementary material
Source: PubMed Central journal article supplement (PMC3303944)
Supplement: NIHMS356480-supplement-supplement_1.pdf [file NIHMS356480-supplement-supplement_1.pdf]

**Supplementary Table 1: Known human polymorphisms for efficacy and toxicity of chemotherapy drugs**

| <b>Carboplatin</b>       |                                                                                                                                                                                           |
|--------------------------|-------------------------------------------------------------------------------------------------------------------------------------------------------------------------------------------|
| <b>Polymorphism</b>      | <b>Description</b>                                                                                                                                                                        |
| ALDH3A1*2                | This mutation increases the risk of haemorrhagic cystitis with carboplatin treatment [20].                                                                                                |
| ALDH1A1*2                | This mutation increases the risk of liver toxicity with carboplatin treatment [20].                                                                                                       |
| ERCC1 C8092A             | In carboplatin treatment of non-small cell lung cancer, this mutation has a significant association with higher toxicity [21]. This result was not confirmed by Booton <i>et al.</i> [22] |
| ERCC1 T118C              | Homozygous TT patients have a better response to carboplatin treatment than heterozygotes or homozygous CC patients [23]. This result was not confirmed by Booton <i>et al.</i> [22]      |
| ERCC2 A35931C            | In carboplatin treatment of non-small cell lung cancer, this mutation has a significant association with higher toxicity [21].                                                            |
| GSTP1 A342G              | Patients with this mutation were more sensitive to carboplatin treatment [24].                                                                                                            |
| hMSH2 TgIVS12-6C         | Patients with the homozygous CC genotyped responded significantly better to carboplatin treatment. No significant effect was observed for heterozygous patients [25].                     |
| hMLH1 T1151A             | No significant response difference to carboplatin treatment was observed for this polymorphism [25].                                                                                      |
| MRP2 C24T                | Patients with this mutation were more sensitive to carboplatin treatment [24].                                                                                                            |
| <b>Floxuridine</b>       |                                                                                                                                                                                           |
| <b>Polymorphism</b>      | <b>Description</b>                                                                                                                                                                        |
| CDA A79C                 | In patients with this mutation there was a 19% decrease in plasma clearance of floxuridine [26].                                                                                          |
| CDA G208A                | This mutation was associated with 64% lowered plasma clearance of floxuridine in homozygotes and 17% lowered clearance in heterozygotes [26].                                             |
| CDA -31delC              | A 7% decrease in plasma clearance was observed for this deletion [26].                                                                                                                    |
| MTHFR A1298C             | A significantly higher efficacy of floxuridine was observed with the CC genotype [27].                                                                                                    |
| TS Y33H                  | This mutation is associated with a four-fold resistance to floxuridine [28].                                                                                                              |
| TYMS 2R 3Rc 3Rg          | A higher number of tandem repeats on the TYMS gene is associated with higher floxuridine efficacy [29].                                                                                   |
| <b>Gemcitabine (GEM)</b> |                                                                                                                                                                                           |

| <b>Polymorphism</b> | <b>Description</b>                                                                                                                                                                                                                                                                                                                                                                                                                            |
|---------------------|-----------------------------------------------------------------------------------------------------------------------------------------------------------------------------------------------------------------------------------------------------------------------------------------------------------------------------------------------------------------------------------------------------------------------------------------------|
| CDA A76C            | This mutation was significantly associated with neutropenia toxicity and decreased efficacy post gemcitabine hydrochloride treatment in patients with locally advanced pancreatic cancer [30].<br><br>Another study confirms that gemcitabine efficacy was lowered due to this mutation [31]. However, the gene was not found to have significant impact on gemcitabine pharmacokinetics in non-small-cell lung cancer (NSCLC) patients [32]. |
| CDA G208A           | In a study of 250 Japanese cancer patients Suguyama et al. observed that there was an effect of this mutation on the plasma clearance rate of GEM [33]. Yonemori <i>et al.</i> show that patients homozygous for the mutation experienced significantly higher toxicity with gemcitabine than other patients [34]. Ueno et al. confirmed the toxicity associated with this mutation [35].                                                     |
| dCK C-1205T         | This mutation was significantly associated with lowered tumor response to gemcitabine-based therapy and was marginally associated with progression-free survival [30].                                                                                                                                                                                                                                                                        |
| dCK A 9846G         | Homozygotes for this mutation were shown to be less sensitive to gemcitabine compared with heterozygotes and homozygous wild-type patients when treated for pancreatic cancer [36].                                                                                                                                                                                                                                                           |
| hCNT1 G565A         | Patients heterozygous and homozygous for the mutation show lower GEM plasma clearance for treatment of solid tumors than patients without the mutation [37].                                                                                                                                                                                                                                                                                  |
| hENT1 A-201G        | This mutation was significantly associated with lowered tumor response to gemcitabine-based therapy and was marginally associated with progression-free survival [30].                                                                                                                                                                                                                                                                        |
| hENT1 G-706C        | Homozygous patients without this mutation have 10% higher plasma clearance of GEM when treated for solid tumor cancers [37].                                                                                                                                                                                                                                                                                                                  |
| hENT1 C913T         | This mutation was significantly associated with neutropenia toxicity post gemcitabine hydrochloride treatment in patients with locally advanced pancreatic cancer [30].                                                                                                                                                                                                                                                                       |
| MRP2 G40A           | This mutation was associated with lowered efficacy in preoperative gemcitabine treatment [38].                                                                                                                                                                                                                                                                                                                                                |
| MTHFR C677T         | In the CC genotype gemcitabine was significantly more efficacious than in CT and TT genotypes [39].                                                                                                                                                                                                                                                                                                                                           |
| RRM1 A33G           | This mutation was significantly associated with lowered tumor response to gemcitabine-based therapy and was marginally associated with progression-free survival [30].                                                                                                                                                                                                                                                                        |
| SMYD3               | SMYD3 knock-down lowered the efficacy of gemcitabine in treatment of pancreatic cancer [40].                                                                                                                                                                                                                                                                                                                                                  |

---

**Methotrexate (MTX)**

---

| <b>Polymorphism</b> | <b>Description</b>                                                                                                                                                                                                                                                                                                                                                                                                                                                                                           |
|---------------------|--------------------------------------------------------------------------------------------------------------------------------------------------------------------------------------------------------------------------------------------------------------------------------------------------------------------------------------------------------------------------------------------------------------------------------------------------------------------------------------------------------------|
| ABCC2 C-24T         | The risk to have folinate rescue as 9-fold in female patients carrying at least one -24T allele [41].                                                                                                                                                                                                                                                                                                                                                                                                        |
| AMPD1 C34T          | Patients with the T variant were more likely to have a good clinical response to MTX treatment [42].                                                                                                                                                                                                                                                                                                                                                                                                         |
| ATIC C347G          | Patients with the 347CC genotype were more likely to have a good clinical response to MTX treatment [42].                                                                                                                                                                                                                                                                                                                                                                                                    |
| ITPA C94A           | Patients with the 94CC genotype were more likely to have a good clinical response to MTX treatment [42].                                                                                                                                                                                                                                                                                                                                                                                                     |
| MTHFR C677T         | Better response to MTX treatment, but higher toxicity [43]. Patients homozygous for the mutation had significantly lowered plasma clearance of MTX [44]. The T variant was associated with a significantly higher frequency of rheumatoid arthritis remission [45]. Seidemann et al. found that this polymorphism does not appear to influence the outcome or therapy-associate toxicity in pediatric patients with non-Hodgkin's lymphoma (NHL) treated with high-dose methotrexate infusion regimens [46]. |
| MTHFR A1298C        | Patients homozygous for the variant were at decreased risk for leucopenia [44]. The C variant was associated with a significantly higher frequency of rheumatoid arthritis (RA) remission [45]. The 1298A variant was associated with MTX-related adverse events in Caucasians [47].                                                                                                                                                                                                                         |
| MTHFR A80G          | Patients homozygous for the variant were at decreased risk for leucopenia [44].                                                                                                                                                                                                                                                                                                                                                                                                                              |
| RFC-1 G80A          | The frequency of the AA genotype was higher among MTX responders compared to poor MTX responders in RA treatment [48].                                                                                                                                                                                                                                                                                                                                                                                       |

---

**Mitomycin C (MMC)**

---

| <b>Polymorphism</b> | <b>Description</b>                                                                                                                                                                                                                                                                                                                                                                                                                                                                           |
|---------------------|----------------------------------------------------------------------------------------------------------------------------------------------------------------------------------------------------------------------------------------------------------------------------------------------------------------------------------------------------------------------------------------------------------------------------------------------------------------------------------------------|
| NQO1 C609T          | A C>T mutation in the NQO1 gene at the 609 position was shown to lower the expression of the DT-diaphorase enzyme, which is thought to be involved in MMC efficacy [49]. Some studies show that the efficacy of MMC in ovarian and bladder tumors of patients with the mutation was significantly lowered [50], while another study did not confirm this result in bladder cancer [51]. Lowered MMC efficacy was also not confirmed for colon cancer [52] and metastatic breast cancer [53]. |
| NQO1 T14055C        | The efficacy of MMC in ovarian and bladder tumors of patients with this mutation was significantly                                                                                                                                                                                                                                                                                                                                                                                           |

---

lowered [50].

---

**Topotecan**

---

**Polymorphism****Description**

---

ABCG2 C914A

This mutation in the ABCG2 gene shows a 30% reduction in the efflux transporter [54]. A study shows increased toxicity in heterozygous and homozygous mutant patients [55].

MDR1 G1199T

This mutation was not correlated with efficacy reduction when topotecan was used for kidney cancer treatment [56].

---

**Supplementary Table 2: Chemotherapeutic Agents**

---

**Dose-Response and consistent knock-down in heritability treatment**

| Name          | Class                     | Uses                                                                |
|---------------|---------------------------|---------------------------------------------------------------------|
| Carboplatin   | Alkylating Agent          | Ovarian carcinoma, lung, head and neck cancers                      |
| Floxuridine   | Antimetabolite            | Colorectal cancer                                                   |
| Gemcitabine   | Antimetabolite            | Non-small cell lung cancer, pancreatic cancer, bladder cancer and   |
| Hydrochloride |                           | breast cancer.                                                      |
| Methotrexate  | Antimetabolite            | Acute lymphoblastic leukemia                                        |
| Mitomycin C   | Antibiotic                | Upper gastro-intestinal (e.g. esophageal carcinoma) and breast      |
|               |                           | cancers, as well as by bladder instillation for superficial bladder |
|               |                           | tumors                                                              |
| Topotecan     | Topoisomerase I Inhibitor | Ovarian cancer and lung cancer                                      |

**Insoluble<sup>1</sup>**

| Name       | Class                                         | Uses                                                                |
|------------|-----------------------------------------------|---------------------------------------------------------------------|
| Cladribine | Antimetabolite                                | Hairy cell leukemia, chronic lymphocytic leukemia, nonHodgkin's     |
|            |                                               | lymphomas                                                           |
| Docetaxel  | Plant Alkaloid, taxane, antimicrotubule agent | Breast Cancer, non-small cell lung cancer, advanced stomach         |
|            |                                               | cancer, head and neck cancer, and metastatic prostate cancer        |
| Etoposide  | Plant Alkaloid, topoisomerase II inhibitor    | Testicular, bladder, prostate, lung, stomach, and uterine, cancers. |
|            |                                               | Hodgkin's and non-Hodgkin's lymphoma, mycosis fungoides,            |
|            |                                               | Kaposi's sarcoma, Wilm's tumor, rhabdomyosarcoma, Ewing's           |
|            |                                               | sarcoma, neuroblastoma, brain tumors                                |
| Paclitaxel | Plant Alkaloid, taxane, antimicrotubule agent | breast, ovarian, lung, bladder, prostate, melanoma, esophageal, as  |
|            |                                               | well as other types of solid tumor cancers                          |
| Tamoxifen  | Anti-estrogen                                 | Metastatic breast cancer, ovarian cancer                            |

**Fatal at Working Dose<sup>2</sup>**

| Name | Class | Uses |
|------|-------|------|
|------|-------|------|

---

---

|             |                          |                                                                                                                                                                                                                             |
|-------------|--------------------------|-----------------------------------------------------------------------------------------------------------------------------------------------------------------------------------------------------------------------------|
| Doxorubicin | Anthracycline antibiotic | Bladder, breast, head and neck, leukemia (some types), liver, lung, lymphomas, mesothelioma, multiple myeloma, neuroblastoma, ovary, pancreas, prostate, sarcomas, stomach, testis (germ cell), thyroid, and uterus cancers |
|-------------|--------------------------|-----------------------------------------------------------------------------------------------------------------------------------------------------------------------------------------------------------------------------|

**No Female Fertility Response to Varied Doses<sup>3</sup>**

| Name             | Class                | Uses                                                                                                                                   |
|------------------|----------------------|----------------------------------------------------------------------------------------------------------------------------------------|
| 5-Fluorouracil   | Antimetabolite       | Colon, rectal, breast, gastrointestinal, head and neck, and ovarian cancer                                                             |
| 6-Mercaptopurine | Antimetabolite       | Acute lymphoblastic leukemia                                                                                                           |
| Cisplatin        | Alkylating agent     | Testicular, ovarian, bladder, head and neck, esophageal, small and non-small cell lung, breast, cervical, stomach and prostate cancers |
| Cytarabine       | Antimetabolite       | Different forms of leukemia, lymphoma                                                                                                  |
| Mitoxantrone     | Antitumor Antibiotic | Advanced prostate cancer, acute myelogenous leukemia, breast cancer, non-Hodgkin's lymphoma                                            |
| Procarbazine     | Alkylating agent     | Hodgkin's disease, non-Hodgkin's lymphoma, brain tumors, melanoma, lung cancer, and multiple myeloma                                   |
| Vinorelbine      | Plant alkaloid       | Non-small lung cancer, breast cancer, ovarian cancer, Hodgkin's disease                                                                |

- 
1. Because chemotherapy is delivered orally with food to flies in our assay, we are unable to deliver drugs that are not easily soluble in water, or ones that come out of solution.
  2. The three drugs listed under this category were not used in our heritability assay because they were fatal to the treated females without a significant reduction in fertility.
  3. Maximum dose was set at 150mM. If the chemotherapy agent had to effect on the female fecundity at this dose, it was not used in the heritability assay.

### Supplementary Table 3: Liquid Food Recipe

| Ingredient                                | Amount <sup>1</sup> |
|-------------------------------------------|---------------------|
| Sucrose                                   | 12.5 g              |
| Active Dry Yeast – Fisher Cat#: 8013-01-2 | 17.5 g              |
| Corn Syrup (light) – Karo®                | 5 ml                |
| PBS                                       | 95 ml               |

1. For a total of 100 ml – autoclaved after mixing

**Supplementary Table 4: Recovery and “lay-out” Fly Food**

| Ingredient       | Amount <sup>1</sup> |
|------------------|---------------------|
| Water            | 78.4 ml             |
| Agar             | 0.84 g              |
| Dextrose         | 6.31 g              |
| Sucrose          | 3.423 g             |
| K, Na Tartrate   | 0.96 g              |
| calcium chloride | 0.07 g              |
| corn meal        | 7.6 g               |
| Yeast suspension |                     |
| -yeast           | 3.2 g               |
| -water           | 20 ml               |
| Propionic acid   | 1.6 ml              |
| Tegosept         |                     |
| -tegosept        | 0.1 g               |
| -ethanol         | 1 ml                |

1. For a total of 100 ml



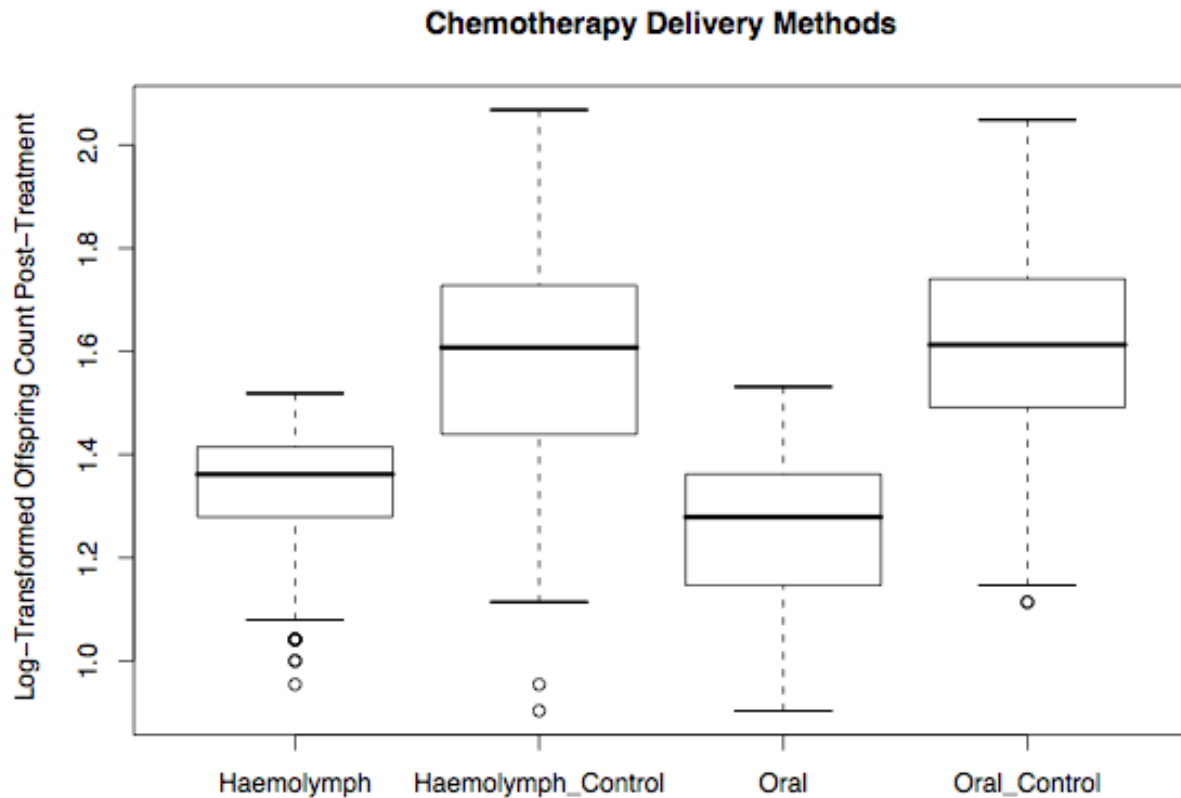

Supplementary Figure 1 – Results of drug delivery experiment. Methotrexate was delivered at a 1.5mM concentration to *D. melanogaster* in two forms: oral mixture in liquid food (Supplementary Table 3) and via haemolymph injections [16]. Two hundred flies were treated with methotrexate and their offspring were counted as a measure of toxicity – the y-axis represents  $\log_{10}$  – transformed number of offspring produced by each female post-chemotherapeutic agent treatment. The F-test, which tests for the difference of two variances for a sample size of 200 in each group, showed that the variances of the two groups were statistically similar ( $p>0.07$ ).

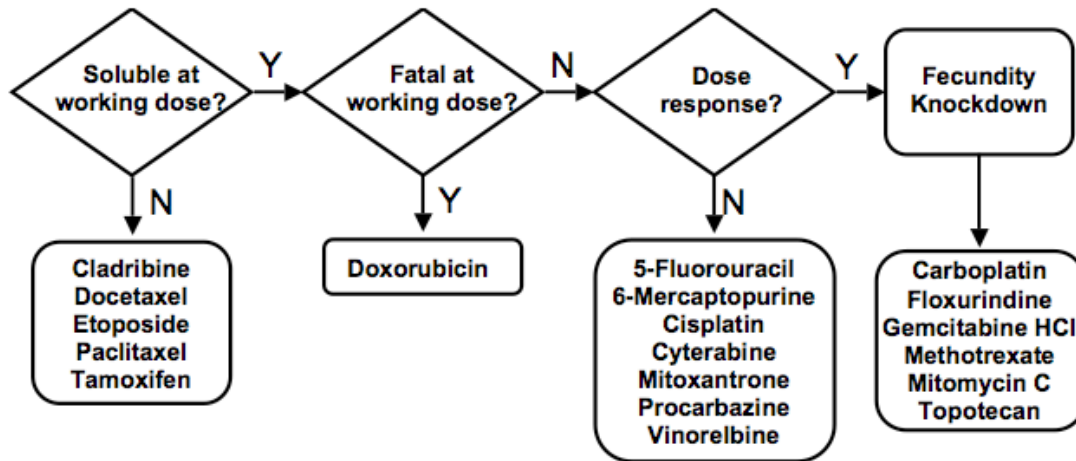

Supplementary Figure 2 – Chemotherapeutic agents. This figure demonstrates the steps taken to arrive at the final chemotherapeutic agents used in our heritability assay. Some of the drugs were not soluble in water, and we were unable to deliver them orally to flies, of those that were soluble, Doxorubicin was fatal to *Drosophila*. Seven of the drugs did not have a significant reduction in female fecundity at different doses delivered. Six of the drugs we tested had a statistically significant dose response (see also Figure 1).
